# Supplementary material for: Azide–alkynecycloadditionen route towards 1H-1,2,3-triazole-tethered β-lactam–ferrocene and β-lactam–ferrocenylchalcone conjugates: synthesis and in vitro anti-tubercular evaluation
Source: Royal Society of Chemistry journal article supplement (doi:10.1039/c2dt32148c), 2012-10-10

# Azide-Alkyne Cycloaddition *en route* towards 1*H*-1,2,3-triazole-tethered $\beta$ -lactam-ferrocene and $\beta$ -lactam-ferrocenylchalcone conjugates: Synthesis and *In vitro* Anti-tubercular Evaluation

Kewal Kumar,<sup>a</sup> Séverine Carrère-Kremer,<sup>b</sup> Laurent Kremer,<sup>b,c</sup> Yann Guérardel,<sup>d,e</sup> Christophe Biot,<sup>d,e</sup> Vipin Kumar\*<sup>a</sup>

<sup>a</sup>Department of Chemistry, Guru Nanak Dev University, Amritsar-143005, Punjab, India. Fax: +91-183-2258819-20; Tel: +91-183-2258802extn. 3320; E-mail: [vipan\\_org@yahoo.com](mailto:vipan_org@yahoo.com)

<sup>b</sup>Laboratoire de Dynamique des Interactions Membranaires Normales et Pathologiques, UMR 5235 CNRS, Université de Montpellier 2I, Place Eugène Bataillon, 34095 Montpellier Cedex 05, France

<sup>c</sup>INSERM, DIMNP, Place Eugène Bataillon, 34095 Montpellier Cedex 05, France

<sup>d</sup>Université Lille Nord de France, Université de Lille 1, Unité de Glycobiologie Structurale et Fonctionnelle, F-59650 Villeneuve d'Ascq, France  
<sup>e</sup> CNRS, UMR 8576, F-59650 Villeneuve d'Ascq, France

**Supplementary Information:**

### $^1\text{H}$ and $^{13}\text{C}$ NMR spectra of representative compounds:

$^1\text{H}$  NMR spectrum of 3-[(1-{2-[4-(3-ferrocenyl-acryloyl)-phenoxy]-ethyl}-1H-[1,2,3]triazol-4-ylmethyl)-amino]-4-styryl-1-p-tolyl-azetidin-2-one (**10b**).

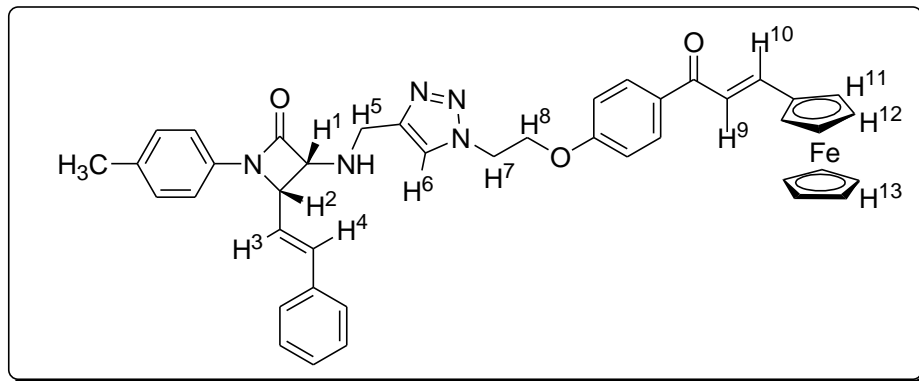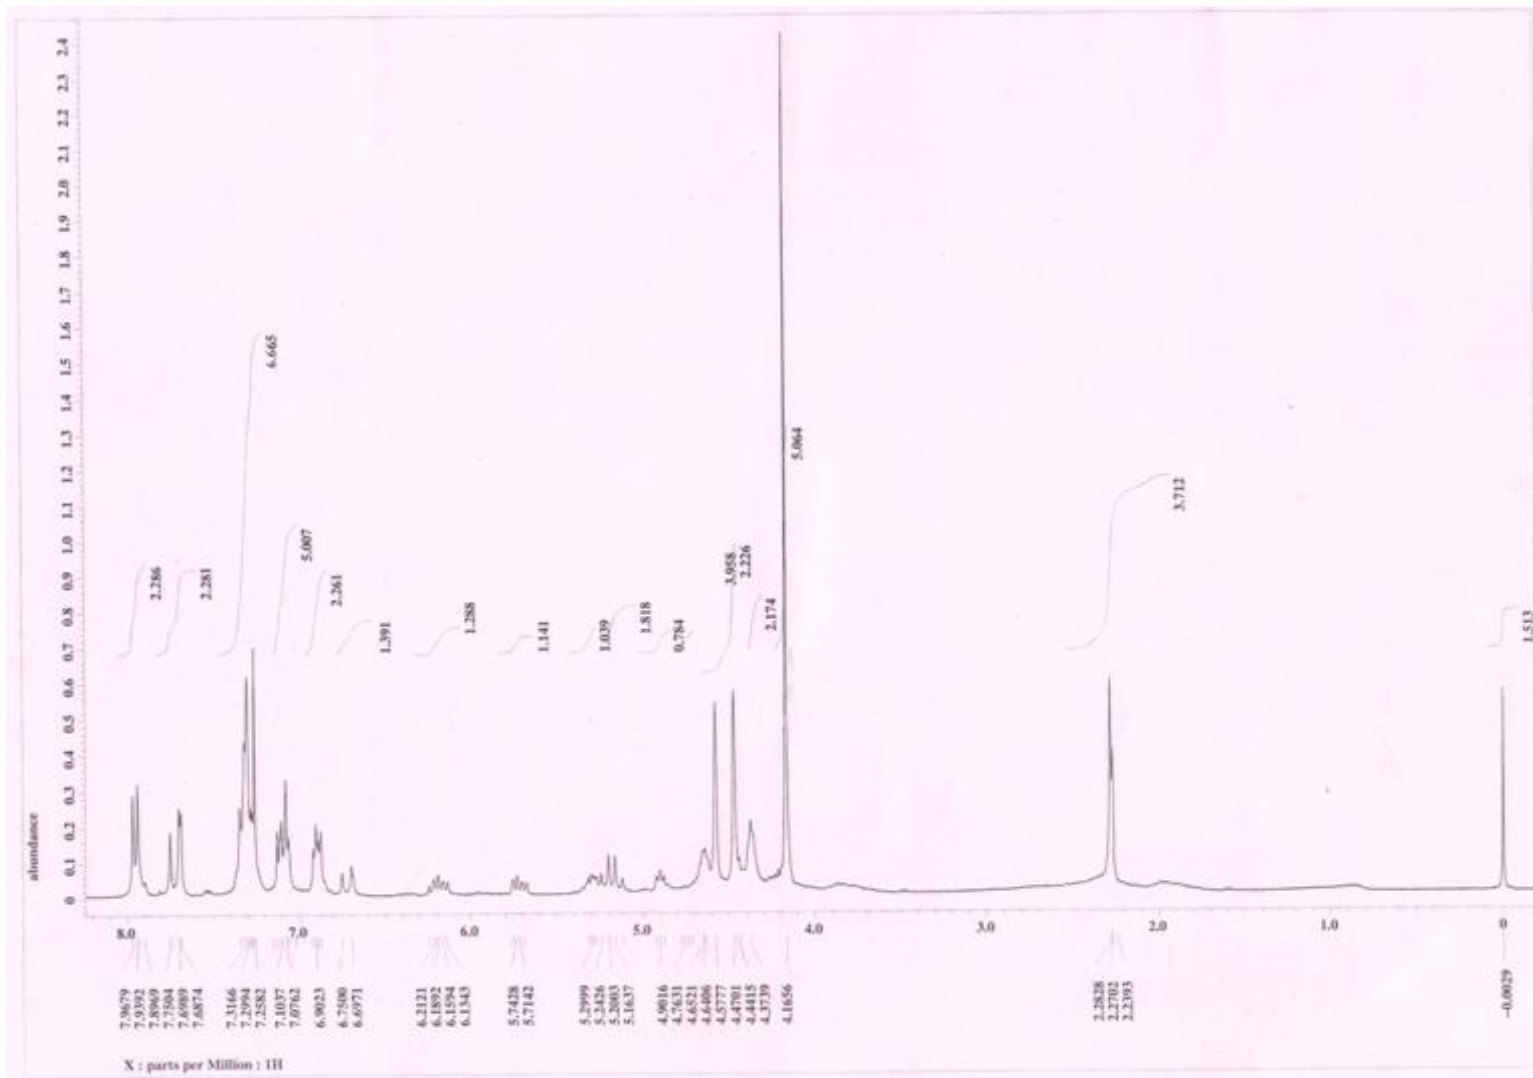

$^{13}\text{C}$  NMR spectrum of 3-[(1-{2-[4-(3-ferrocenyl-acryloyl)-phenoxy]-ethyl}-1H-[1,2,3]triazol-4-ylmethyl)-amino]-4-styryl-1-p-tolyl-azetidin-2-one (**10b**).

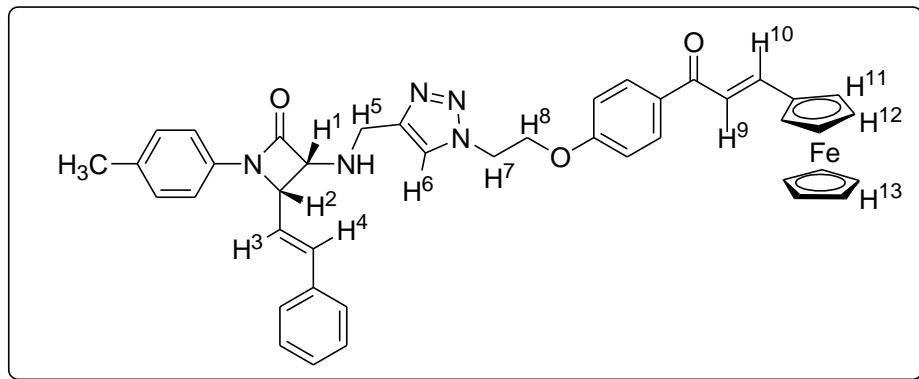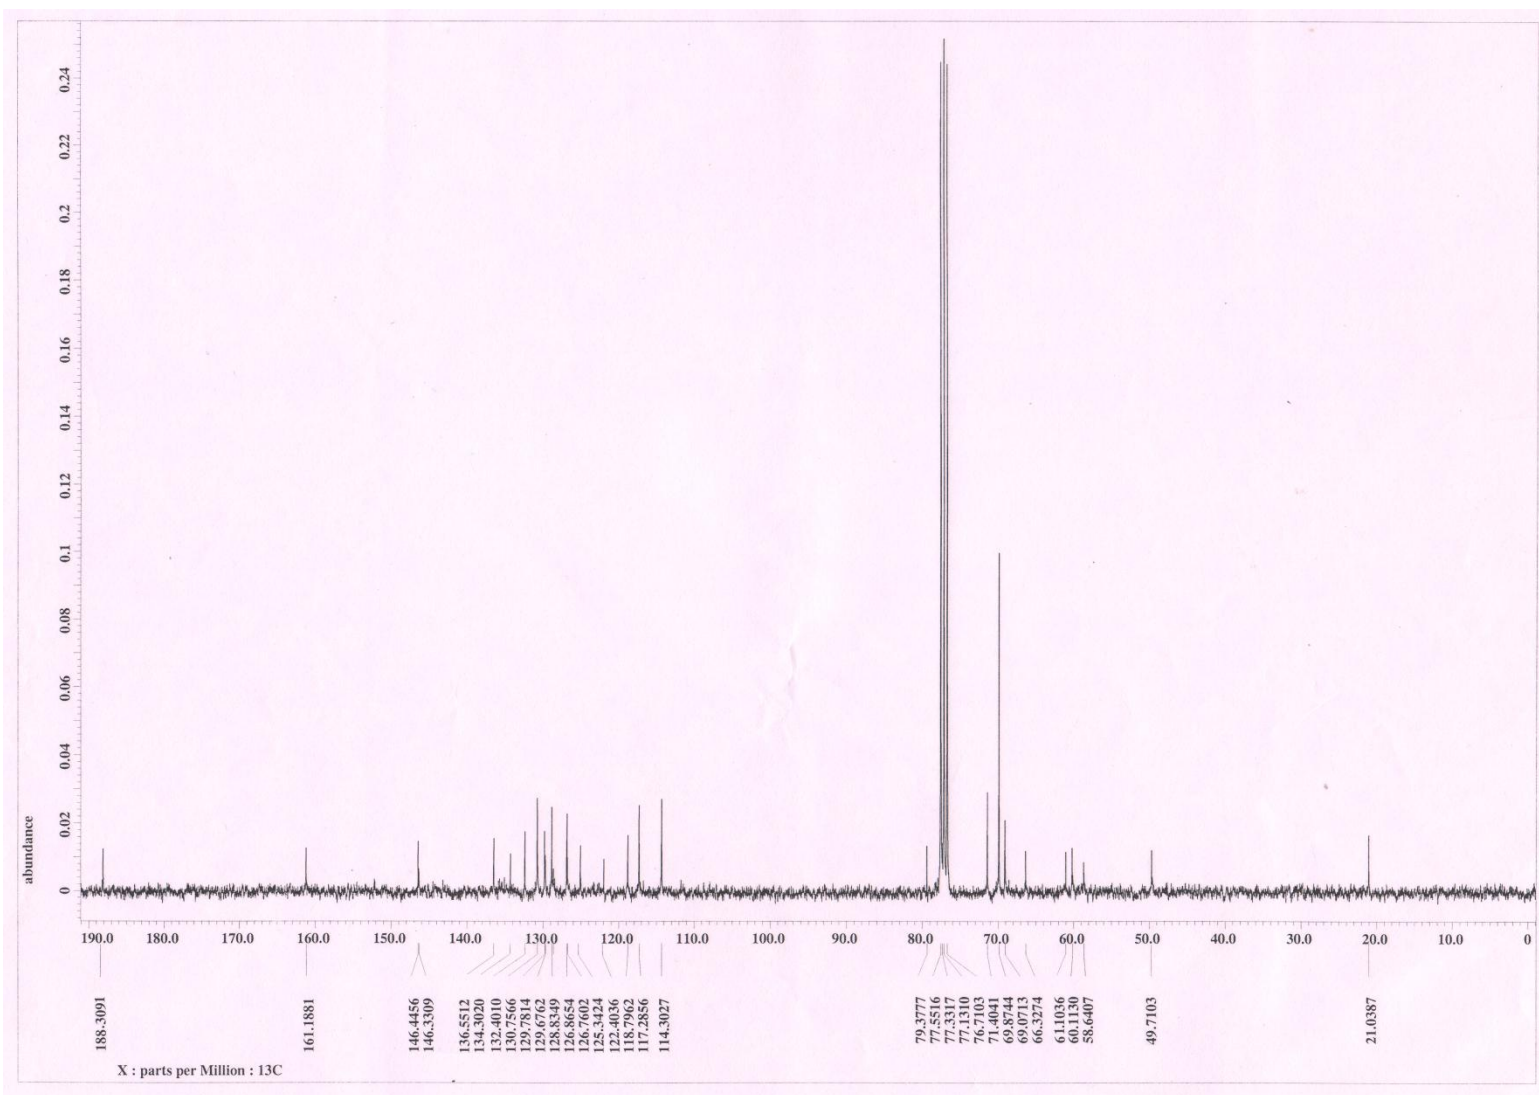

$^1\text{H}$  NMR spectrum of 3-[(1-{3-[4-(3-ferrocenyl-acryloyl)-phenoxy]-propyl}-1H-[1,2,3]triazol-4-ylmethyl)-amino]-1-(4-fluoro-phenyl)-4-styryl-azetidin-2-one (**10g**).

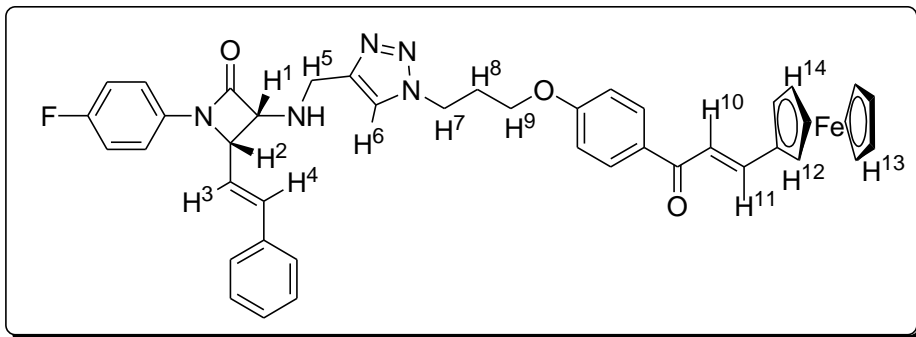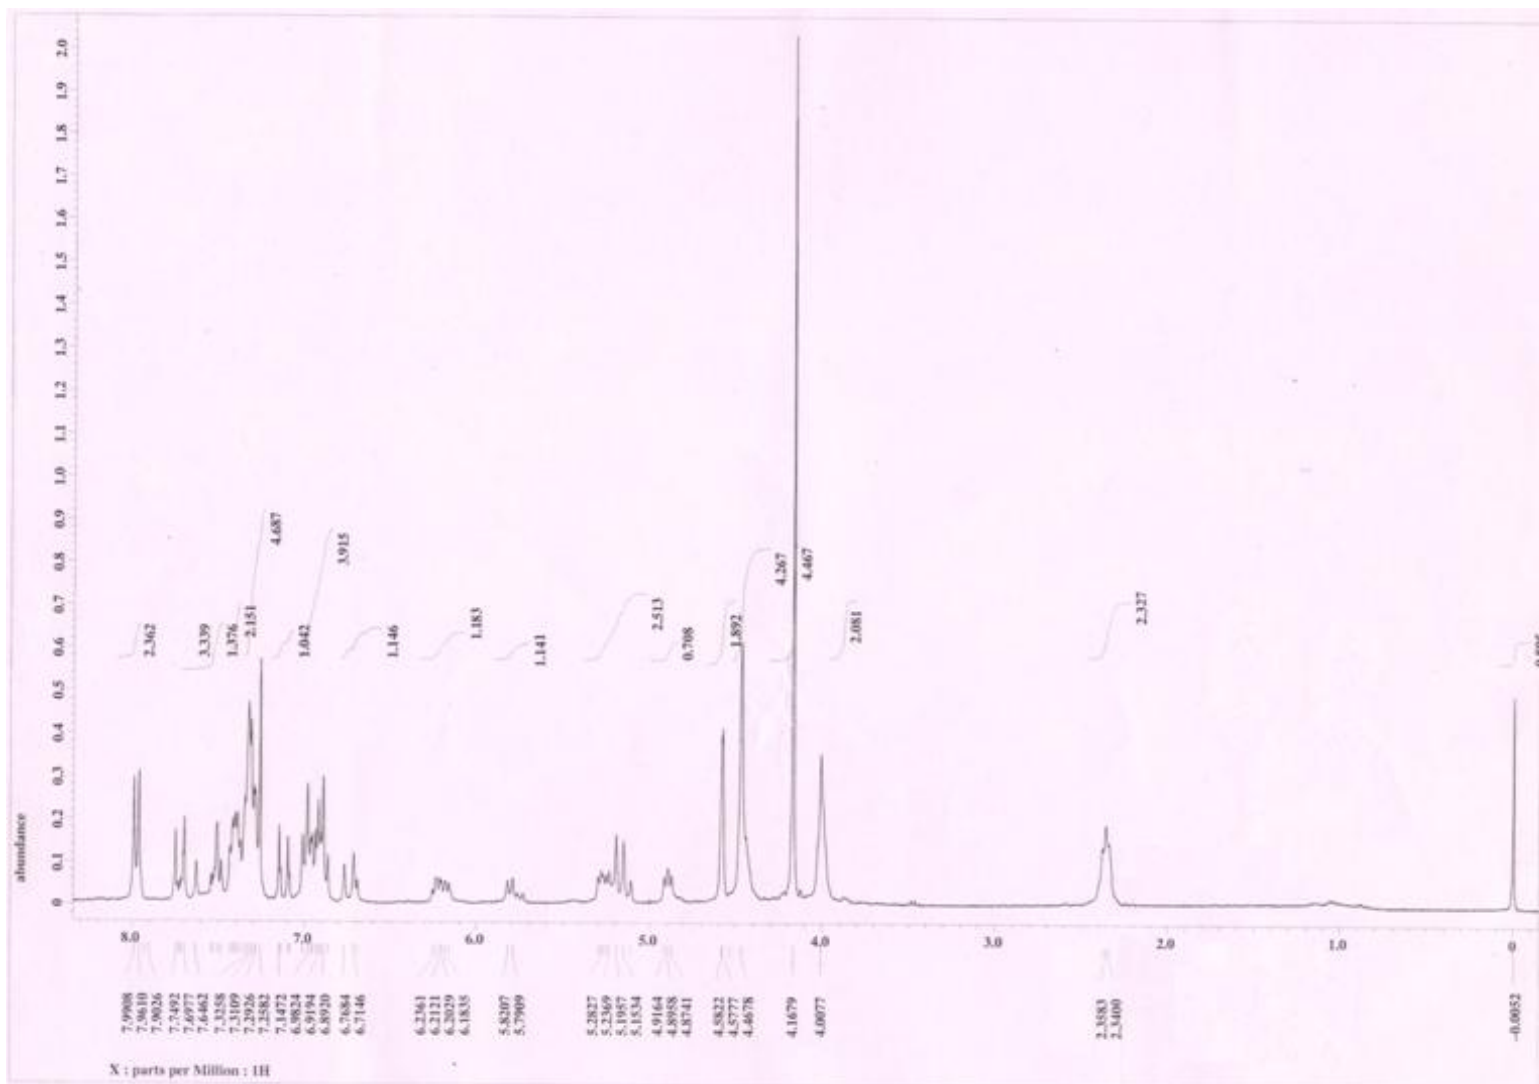

$^{13}\text{C}$  NMR spectrum of 3-[(1-{3-[4-(3-ferrocenyl-acryloyl)-phenoxy]-propyl}-1H-[1,2,3]triazol-4-ylmethyl)-amino]-1-(4-fluoro-phenyl)-4-styryl-azetidin-2-one (**10g**).

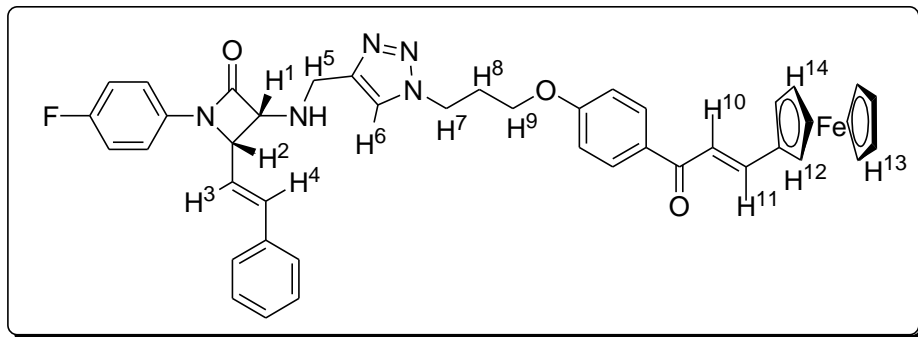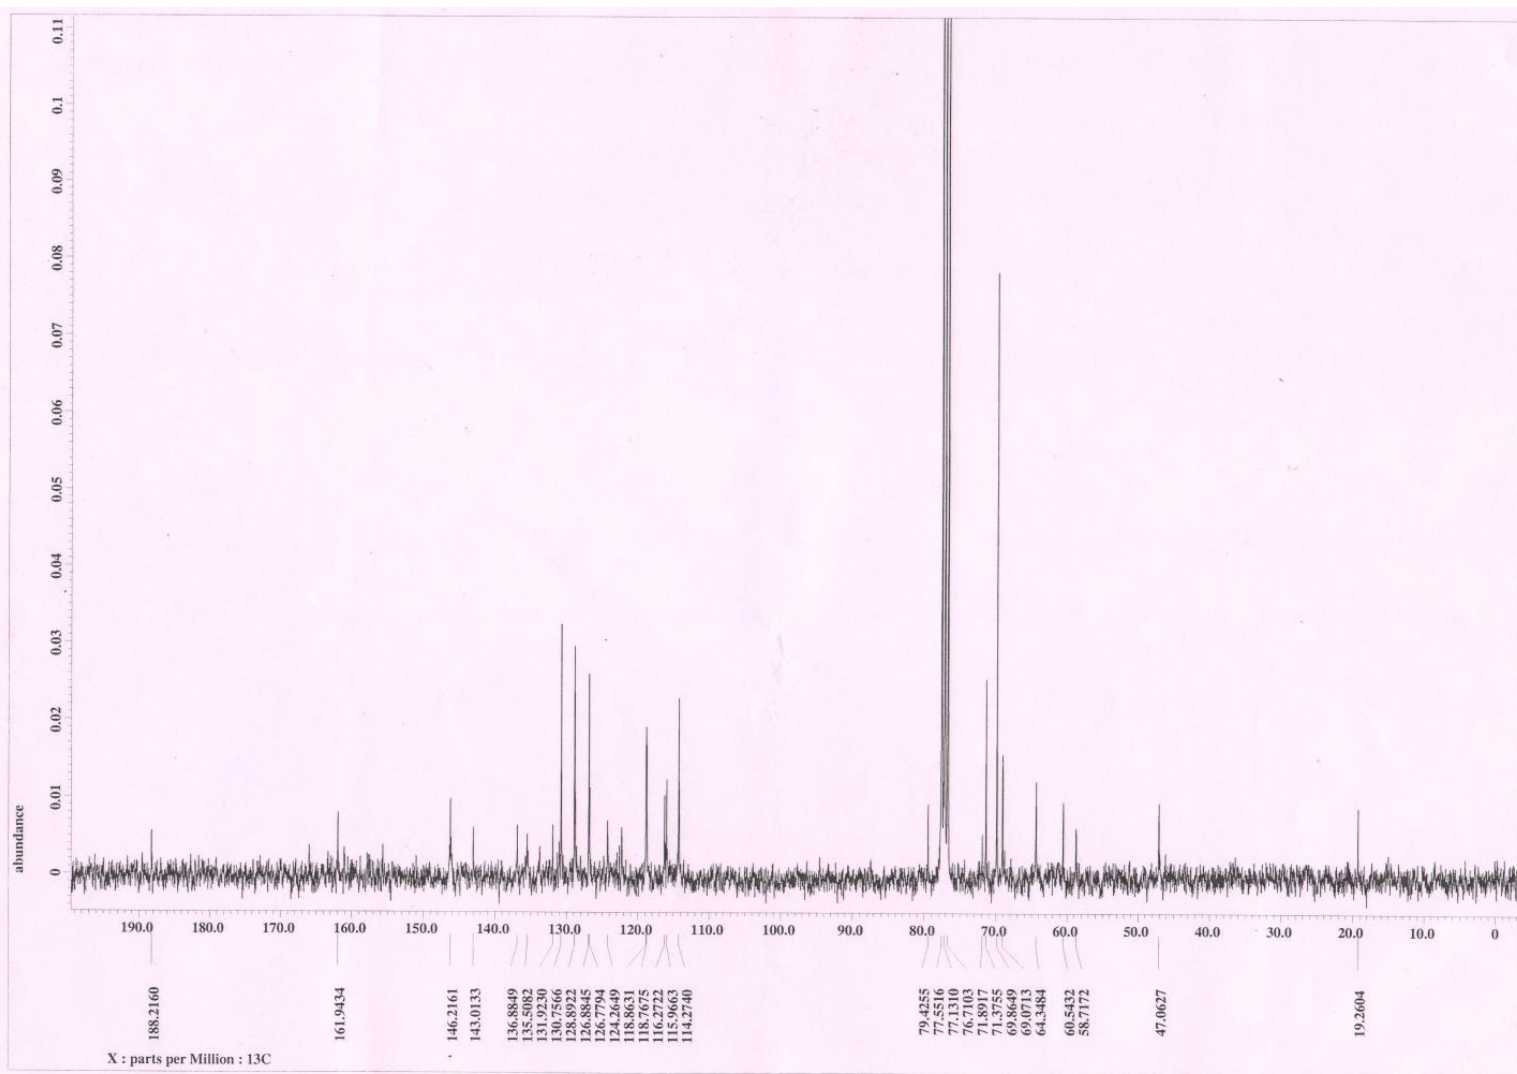

$^1\text{H}$  NMR spectrum of 3-[Bis-(1-{2-[4-(3-ferrocenyl-acryloyl)-phenoxy]-ethyl}-1H-[1,2,3]triazol-4-ylmethyl)-amino]-4-styryl-1-p-tolyl-azetidin-2-one (**11b**).

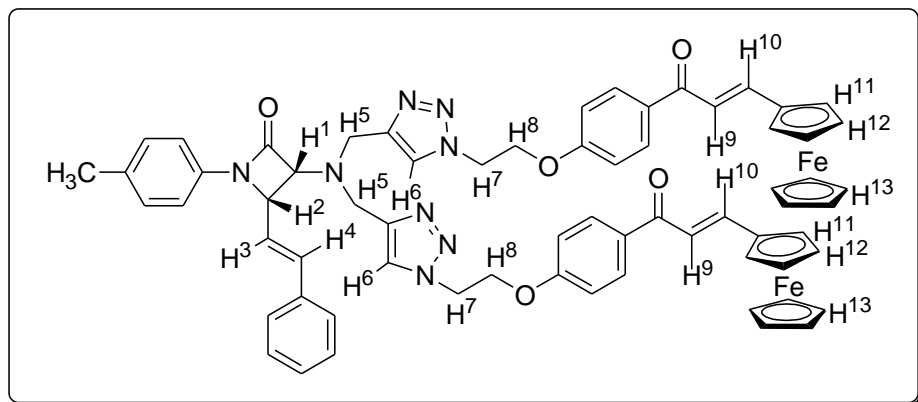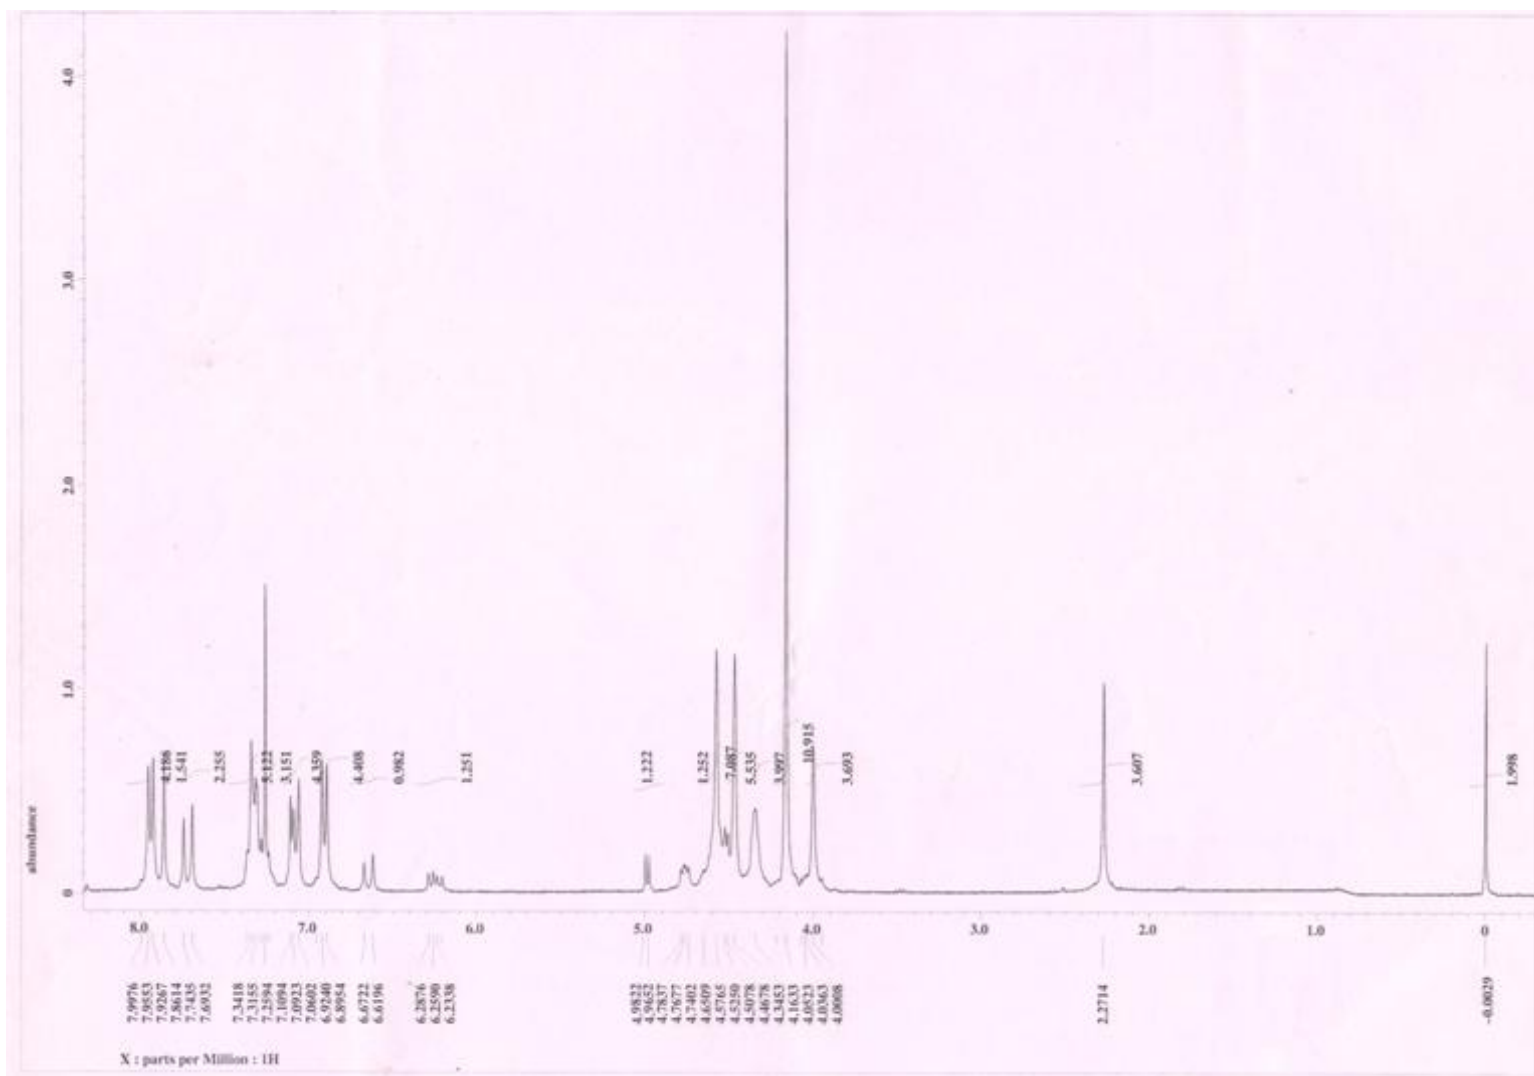

$^{13}\text{C}$  NMR spectrum of 3-[Bis-(1-{2-[4-(3-ferrocenyl-acryloyl)-phenoxy]-ethyl}-1H-[1,2,3]triazol-4-ylmethyl)-amino]-4-styryl-1-p-tolyl-azetidin-2-one (**11b**).

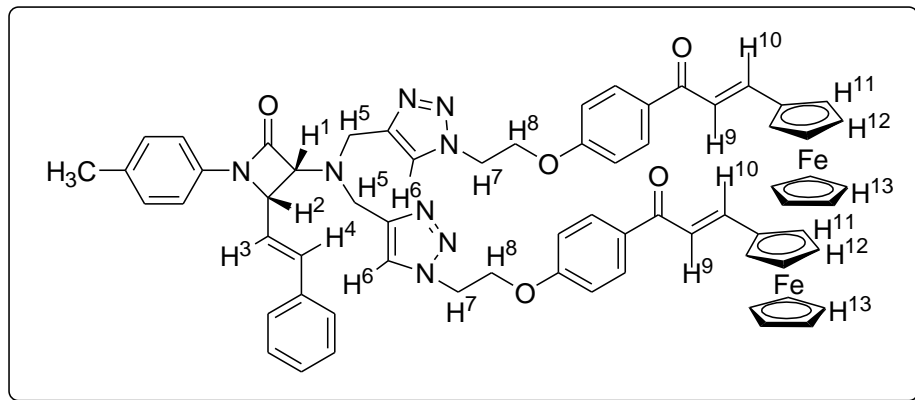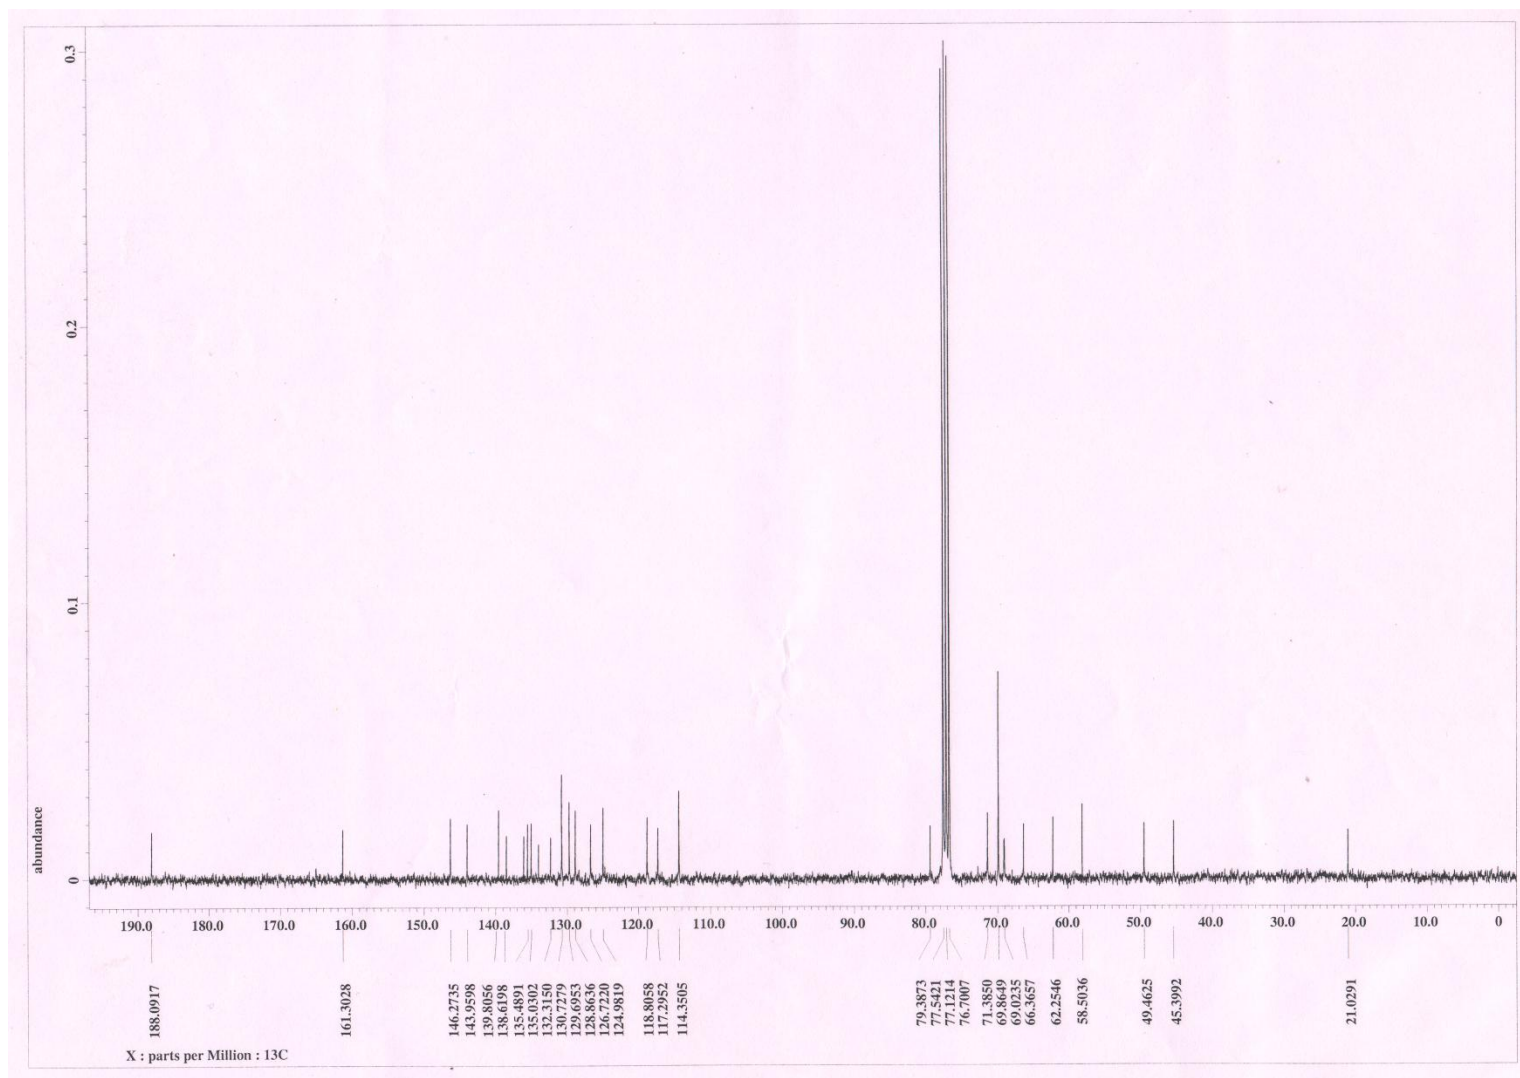

Supplement: c2dt32148c.pdf [file c2dt32148c.pdf]
